# Supplementary material for: A piezoelectric quantum spin Hall insulator VCClBr monolayer with a pure out-of-plane piezoelectric response
Source: Royal Society of Chemistry journal article supplement (doi:10.1039/d2cp02724k), 2022-01-01
Supplement: d2cp02724k1.pdf [file d2cp02724k1.pdf]

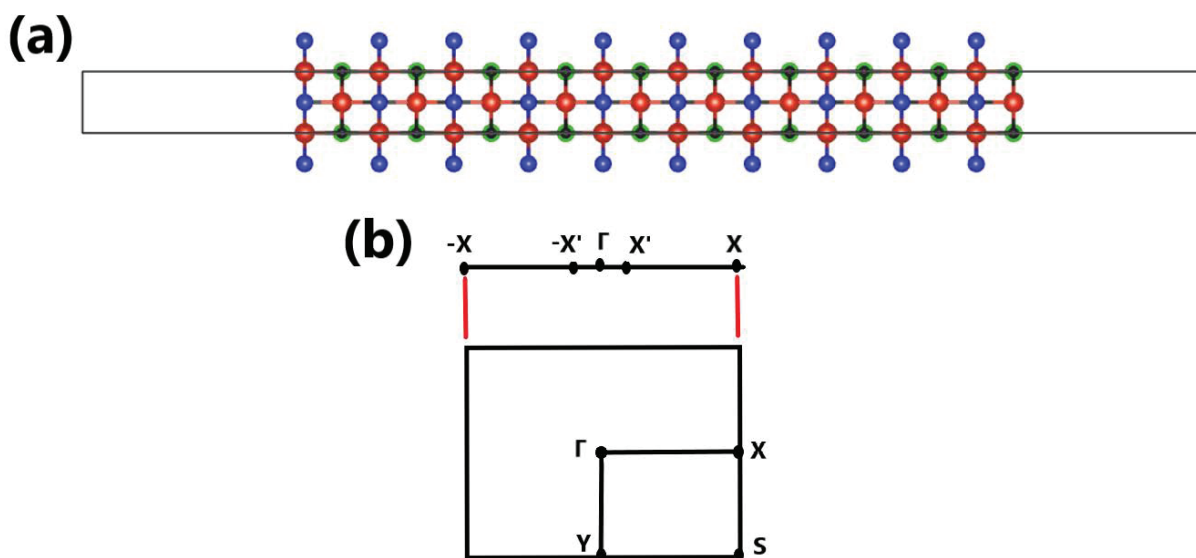

FIG. 1. (Color online) For VCClBr monolayer, (a): to simulate the topological edge states, the constructed nanoribbon; (b): the 2D BZ of VCClBr and projected edge BZ for nanoribbons together with high symmetry points.

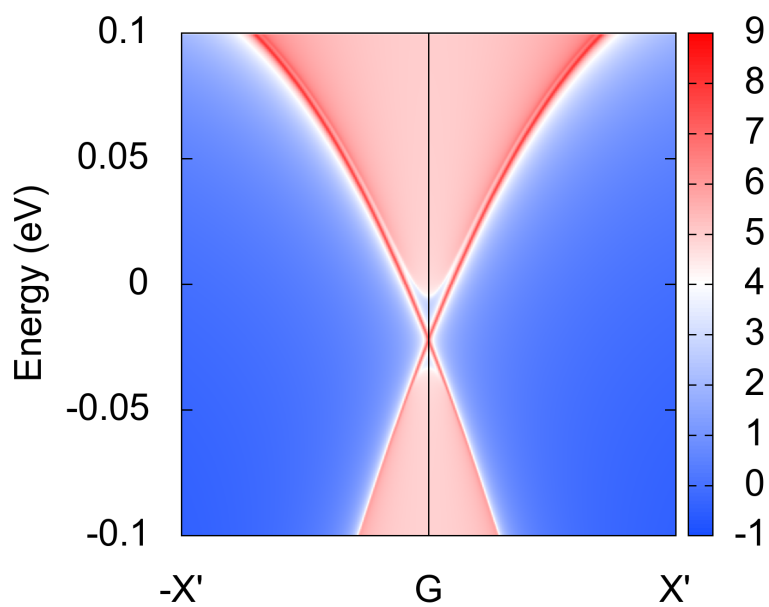

FIG. 2. (Color online) For VCCl<sub>2</sub> monolayer, topological helical edge states under 0.04 eV/Å electric field.

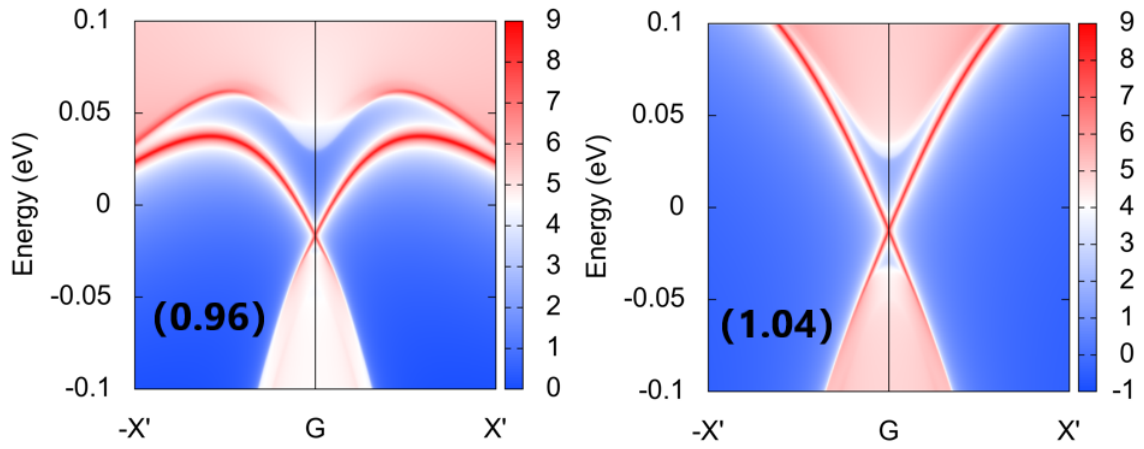

FIG. 3. (Color online) For VCClBr monolayer, topological helical edge states under 0.96 and 1.04 biaxial strains. The Fermi level has been shifted to the gap along  $\Gamma$ -Y path.

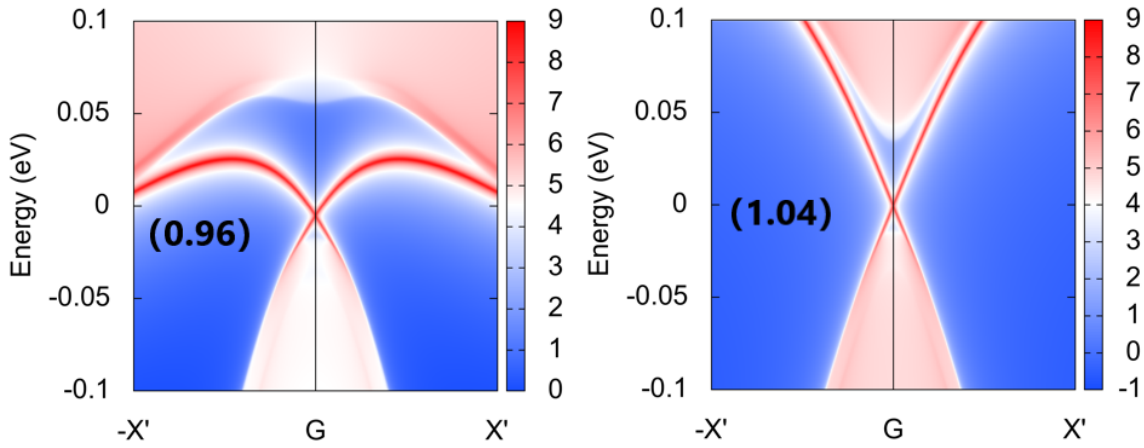

FIG. 4. (Color online) For VCClBr monolayer, topological helical edge states under 0.96 and 1.04 uniaxial- $a$  strains. The Fermi level has been shifted to the gap along  $\Gamma$ -Y path.

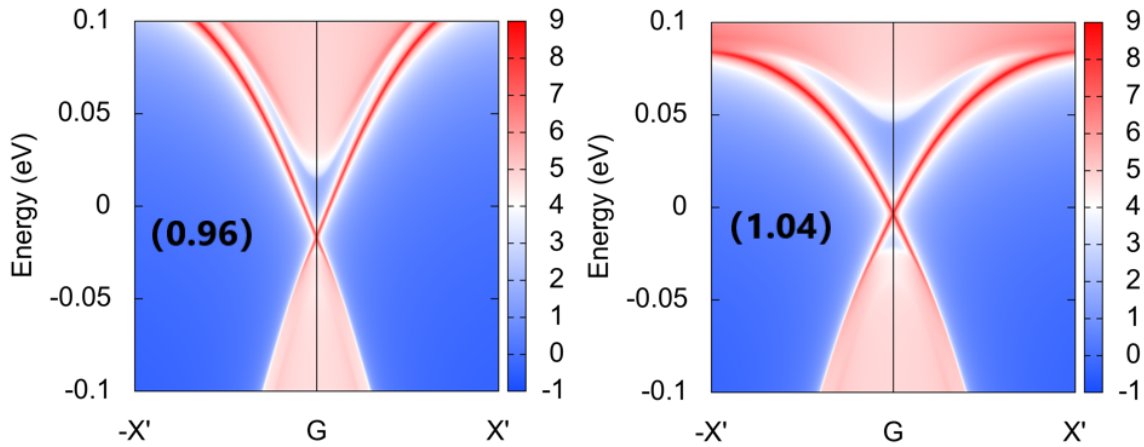

FIG. 5. (Color online) For VCClBr monolayer, topological helical edge states under 0.96 and 1.04 uniaxial- $b$  strains. The Fermi level has been shifted to the gap along  $\Gamma$ -Y path.

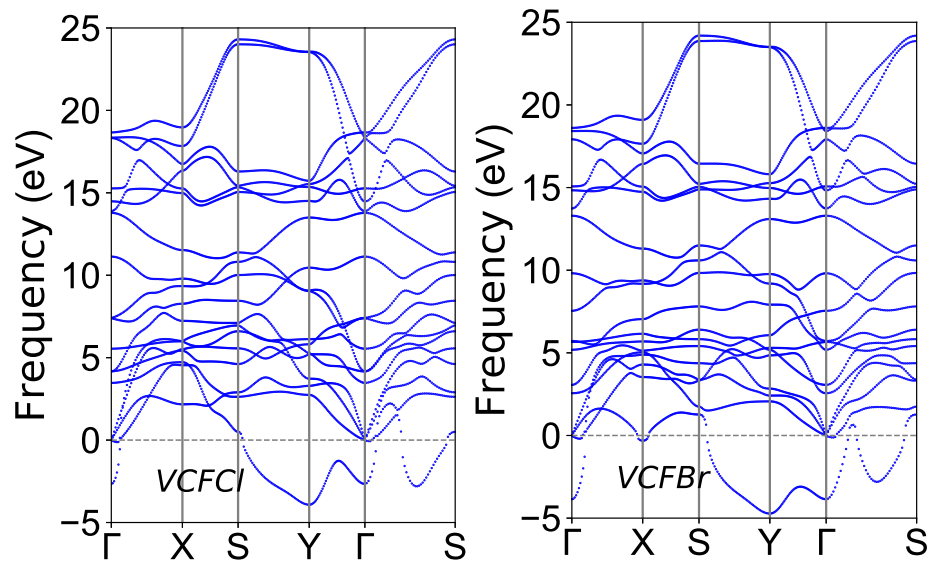

FIG. 6. (Color online) The phonon band dispersions of VCFC1 and VCFBr.
